# Supplementary material for: Development and Validation of the Young Parenting Inventory (YPI-R3) for Measuring Past Deviant and Normal Variations in Parenting
Source: MDPI journal article supplement (doi:10.3390/children9050706), 2022-05-11
Supplement: s1 [file s1]

# **Supporting Information**

## **Development and Validation of the Young Parenting Inventory (YPI-R3) for Measuring Past Deviant Parenting Patterns**

## **Text S1. Investigating Differences Across Samples**

### **Explanation regarding test and calculations**

A t-test is applied only to compare average values between two groups. When we compare two proportions, a z-test is the most suitable and was especially developed for this purpose. When we need to compare proportions between several groups (like race proportions in men and women) a chi-squared test is suitable.

### **Differences in ages between men and women using t-tests**

There were significant differences in the USA sample between the age of men ( $M=45.04$ ,  $SD=9.60$ ), and women ( $M=42.90$ ,  $SD=8.75$ ),  $t(394)=2.27$ ,  $p=0.024$ .

There were significant differences in the South Africa sample between the ages of men ( $M=43.42$ ,  $SD=6.39$ ), and women ( $M=41.22$ ,  $SD=6.92$ ),  $t(388)=3.18$ ,  $p=0.002$ .

There were significant differences in the Nigeria sample between the ages of men ( $M=46.63$ ,  $SD=7.04$ ), and women ( $M=44.43$ ,  $SD=7.21$ ),  $t(362)=2.92$ ,  $p=0.004$ .

There were no significant differences in the India sample between the ages of men ( $M=42.95$ ,  $SD=7.33$ ), and women ( $M=41.69$ ,  $SD=8.05$ ),  $t(304)=1.43$ ,  $p=0.154$ .

There were no significant differences in the Singapore sample between the ages of men ( $M=45.97$ ,  $SD=23.27$ ), and women ( $M=46.39$ ,  $SD=21.69$ ),  $t(626)=0.31$ ,  $p=0.756$ .

There were no significant differences in the Kuala Lumpur sample between the ages of men ( $M=39.86$ ,  $SD=17.47$ ), and women ( $M=42.25$ ,  $SD=17.34$ ),  $t(227)=1.14$ ,  $p=0.256$ .

### **Differences in sample sizes between men and women using z-tests**

#### **USA**

A z-test was conducted in the USA sample comparing the differences in the final sample size between men and women. The result was statistically significant ( $z=4.96$ ,  $p < 0.001$ , two tailed).

A z-test was conducted in the USA sample comparing the differences in the final fathers sample size between men and women. The result was statistically significant ( $z=4.25$ ,  $p < 0.001$ , two tailed).

A z-test was conducted in the USA sample comparing the differences in the final mothers sample size between men and women. The result was statistically significant ( $z=4.43$ ,  $p < 0.001$ , two tailed).

#### **South Africa**

A z-test was conducted in the South African sample comparing the differences in the final sample size between men and women. The result was statistically significant ( $z=3.59$ ,  $p < 0.001$ , two tailed).

A z-test was conducted in the South African sample comparing the differences in the final fathers sample size between men and women. The result was statistically significant ( $z=3.52$ ,  $p < 0.001$ , two tailed).

A z-test was conducted in the South African sample comparing the differences in the final mothers sample size between men and women. The result was statistically significant ( $z=2.98$ ,  $p < 0.001$ , two tailed).

#### Nigeria

A z-test was conducted in the Nigerian sample comparing the differences in the final sample size between men and women. The result was statistically significant ( $z=-2.80$ ,  $p=0.005$ , two tailed).

A z-test was conducted in the Nigerian sample comparing the differences in the final fathers sample size between men and women. The result was statistically significant ( $z=3.05$ ,  $p=0.002$ , two tailed).

A z-test was conducted in the Nigerian sample comparing the differences in the final mothers sample size between men and women. The result was statistically significant ( $z=2.77$ ,  $p=0.006$ , two tailed).

#### India

A z-test was conducted in the Indian sample comparing the differences in the final sample size between men and women. The result was not statistically significant – ( $z=-1.82$ ,  $p=0.069$ , two tailed).

A z-test was conducted in the Indian sample comparing the differences in the final fathers sample size between men and women. The result was not statistically significant ( $z=1.61$ ,  $p=0.106$ , two tailed).

A z-test was conducted in the Indian sample comparing the differences in the final mothers sample size between men and women. The result was not statistically significant ( $z=1.58$ ,  $p=0.114$ , two tailed).

#### Singapore

A z-test was conducted in the Singaporean sample comparing the differences in the final sample size between men and women. The result was statistically significant ( $z=4.32$ ,  $p < 0.001$ , two tailed).

A z-test was conducted in the Singaporean sample comparing the differences in the final fathers sample size between men and women. The result was statistically significant ( $z=3.89$ ,  $p < 0.001$ , two tailed).

A z-test was conducted in the Singaporean sample comparing the differences in the final mothers sample size between men and women. The result was statistically significant ( $z=4.32$ ,  $p < 0.001$ , two tailed).

#### Kuala Lumpur

A z-test was conducted in the Kuala Lumpur sample comparing the differences in the final sample size between men and women. The result was statistically significant  $z=4.13$ ,  $p < 0.001$ , two tailed).

A z-test was conducted in the Kuala Lumpur sample comparing the differences in the final fathers sample size between men and women. The result was statistically significant ( $z=4.13$ ,  $p < 0.001$ , two tailed).

A z-test was conducted in the Kuala Lumpur sample comparing the differences in the final mothers sample size between men and women. The result was statistically significant ( $z=4.13$ ,  $p < 0.001$ , two tailed).

## **Differences in races between men and women using chi-squared ( $\chi^2$ ) tests**

### **USA**

A chi-squared test was conducted to see differences in gender regarding the various races in the USA sample. The result was not statistically significant  $\chi^2 (4, 396) = 4.48, p=0.345$ .

### **South Africa**

A chi-squared test was conducted to see differences in gender regarding the various races in the South Africa sample. The result was not statistically significant  $\chi^2 (5, 390) = 1.07, p=0.899$ .

### **Nigeria**

A chi-squared test was conducted to see differences in gender regarding the various races in the Nigerian sample. The result was not statistically significant  $\chi^2 (3, 364) = 3.58, p=0.311$ .

### **India**

A chi-squared test was conducted to see differences in gender regarding the various races in the Nigerian sample. The result was not statistically significant  $\chi^2 (4, 306) = 4.78, p=0.312$ .

### **Singapore**

A chi-squared test was conducted to see differences in gender regarding the various races in the Singapore sample. The result was not statistically significant  $\chi^2 (5, 628) = 4.78, p=0.312$ .

### **Kuala Lumpur**

A chi-squared test was conducted to see differences in gender regarding the various races in the Kuala Lumpur sample. The result was not statistically significant  $\chi^2 (5, 229) = 2.43, p=0.787$ .

**Table S1. EFA of the Initial Item Pool of the YPI with 204 Items Using Manila Sample (Father, n = 520; Mother, n = 538; Table taken from Louis et al., 2018, [19])**

| RQ1 Item No. | Item Description                                                                                     | Father  |                     |                                                                        | Mother  |                     |         |
|--------------|------------------------------------------------------------------------------------------------------|---------|---------------------|------------------------------------------------------------------------|---------|---------------------|---------|
|              |                                                                                                      | Loading | Selected for YPI-R3 | Remarks                                                                | Loading | Selected for YPI-R3 | Remarks |
|              | <b><i>Degradation and Rejection</i></b>                                                              |         |                     |                                                                        |         |                     |         |
| 290          | Would call me names (like “stupid” or “idiot”) when I made mistakes.                                 | .73     | ✓                   |                                                                        | .65     | ✓                   |         |
| 313          | Saw me as lacking common sense.                                                                      | .78     | ✓                   |                                                                        | .72     | ✓                   |         |
| 331          | Put me down and made me feel ashamed of myself if I didn’t do well.                                  | .78     | ✓                   |                                                                        | .77     | ✓                   |         |
| 384          | Saw me as having little to contribute.                                                               | .78     | ✓                   |                                                                        | .68     | ✓                   |         |
| 284          | Treated me as if I was stupid or untalented.                                                         | .81     | ✓                   |                                                                        | .68     | ✓                   |         |
| 275          | Made me feel like the “black sheep” of the family.                                                   | .69     |                     | Items dropped as “black sheep” may not be understood in other cultures | .58     |                     |         |
| 307          | Made me feel unloved or rejected.                                                                    | .65     | ✓                   |                                                                        | .70     | ✓                   |         |
| 386          | Criticized me a lot.                                                                                 | .68     |                     |                                                                        | .75     |                     |         |
| 299          | Made me feel that almost nothing I did was quite good enough.                                        | .41     |                     |                                                                        | .46     |                     |         |
| 336          | Was a fearful or phobic person.                                                                      | .42     |                     |                                                                        |         |                     |         |
| 363          | Would ignore me or withdraw from me for long periods of time.                                        | .43     |                     |                                                                        | .48     |                     |         |
| 388          | Made me feel guilty if I did not put his/her needs ahead of mine.                                    | .43     |                     |                                                                        |         |                     |         |
| 355          | I never knew how s/he was going to treat me when s/he woke the next morning.                         | .46     |                     |                                                                        | .40     |                     |         |
| 314          | Often obsessed over minor decisions, because the consequences of making a mistake seemed so serious. | .47     |                     |                                                                        | .45     |                     |         |
| 394          | Was demanding; expected to get things his/her way.                                                   | .47     |                     |                                                                        |         |                     |         |
| 140          | Was never proud of me.                                                                               | .48     |                     |                                                                        | .45     |                     |         |
| 227          | Treated me as if my opinions or desires didn't count.                                                | .49     |                     |                                                                        | .46     |                     |         |
| 6            | Expected me to be a failure in life.                                                                 | .49     |                     |                                                                        | .47     |                     |         |
| 253          | Would often compare my performance at school or sports unfavorably to others.                        | .52     |                     |                                                                        | .51     |                     |         |
| 407          | Would withdraw from me or reject me if I did not do what s/he thought I should.                      | .53     |                     |                                                                        |         |                     |         |
| 188          | Often told me there was something wrong with me.                                                     | .53     |                     |                                                                        | .61     |                     |         |
| 281          | Even if I did very well, s/he would focus on the mistakes or on things I didn’t do very well.        | .53     |                     |                                                                        | .65     |                     |         |
| 243          | Down played my successes.                                                                            | .54     |                     |                                                                        | .48     |                     |         |
| 393          | Even when things were good I was always waiting for the next outburst or bad reaction from him/her.  | .55     |                     |                                                                        | .65     |                     |         |
| 399          | Did not seem to be interested in what I would do with my life.                                       | .56     |                     |                                                                        | .49     |                     |         |
| 167          | Often told me I was bad.                                                                             | .57     |                     |                                                                        | .60     |                     |         |
| 380          | Was unsure about my ability to reach challenging goals.                                              | .57     |                     |                                                                        | .49     |                     |         |

Table S1 (Continued)

| RQ1 Item No. | Item Description                                                                                                                               | Father  |                     |         | Mother  |                     |         |
|--------------|------------------------------------------------------------------------------------------------------------------------------------------------|---------|---------------------|---------|---------|---------------------|---------|
|              |                                                                                                                                                | Loading | Selected for YPI-R2 | Remarks | Loading | Selected for YPI-R2 | Remarks |
|              | <b><i>Degradation and Rejection (Continued)</i></b>                                                                                            |         |                     |         |         |                     |         |
| 325          | I had to compete with my sibling(s) for his/her attention through outperforming them in sports or school.                                      | .61     |                     |         | .63     |                     |         |
| 324          | Didn't trust my ability to solve every day problems on my own that other children my age could.                                                | .62     |                     |         | .65     |                     |         |
| 335          | Treated me as if I was not capable of coping well on my own.                                                                                   | .64     |                     |         | .60     |                     |         |
| 383          | Would make me look foolish or put me down in front of my friends or other adults.                                                              | .68     |                     |         | .67     |                     |         |
| 18           | Believed that I was better than other people.                                                                                                  |         |                     |         | -.45    |                     |         |
| 120          | Treated me as if there was something wrong with me.                                                                                            |         |                     |         | .49     |                     |         |
| 202          | Made me feel to blame when things went wrong.                                                                                                  |         |                     |         | .47     |                     |         |
| 293          | Was critical of my friends.                                                                                                                    |         |                     |         | .43     |                     |         |
| 303          | I felt like I needed to walk on eggshells around him/her.                                                                                      |         |                     |         | .44     |                     |         |
| 333          | I didn't expect him/her to respect me or take my feelings into account.                                                                        |         |                     |         | .46     |                     |         |
|              | <b><i>Competitiveness and Status Seeking</i></b>                                                                                               |         |                     |         |         |                     |         |
| 98           | Placed strong emphasis on success and competition.                                                                                             | .78     | ✓                   |         | .77     | ✓                   |         |
| 64           | Believed that if I was smarter or more talented it made me superior to others who were less so.                                                | .69     | ✓                   |         | .64     | ✓                   |         |
| 63           | Put a lot of emphasis on my getting good grades and getting ahead in life.                                                                     | .68     | ✓                   |         | .73     | ✓                   |         |
| 110          | Believed that you are either a winner or a loser in life.                                                                                      | .63     |                     |         | .47     |                     |         |
| 52           | Was concerned with social status and appearance.                                                                                               | .57     | ✓                   |         | .49     | ✓                   |         |
| 225          | Expected me to do my best at all times.                                                                                                        | .53     | ✓                   |         | .52     | ✓                   |         |
| 121          | Put more emphasis on competition and winning than getting along with others.                                                                   | .54     |                     |         | .53     |                     |         |
| 330          | Drove me to excel at important tasks, couldn't settle for "good enough".                                                                       | .54     |                     |         | .49     |                     |         |
| 236          | Believed I should to what ever it takes to come out ahead.                                                                                     | .54     |                     |         | .47     |                     |         |
| 160          | Was concerned with how my behavior would reflect on him/her in the eyes of others.                                                             | .51     |                     |         | .41     |                     |         |
| 152          | Saw it a "dog eat dog" world and believed that only the toughest and best survive.                                                             | .50     |                     |         | .43     |                     |         |
| 172          | Believed that those who come out ahead should be granted special privileges and not have to live by the same rules as others.                  | .46     |                     |         |         |                     |         |
| 109          | Believed that if someone had a lot of money and status that they would be happier than those who didn't.                                       | .46     |                     |         |         |                     |         |
| 387          | Put a lot of pressure on me to excel in important areas.                                                                                       | .45     |                     |         |         |                     |         |
| 198          | Was a perfectionist in many areas; things had to be "just so".                                                                                 | .44     |                     |         |         |                     |         |
| 244          | Expected me to be the best in important areas; couldn't accept my being second best.                                                           | .43     |                     |         | .45     |                     |         |
| 397          | Seemed to love me more or pay more attention to me when I excelled.                                                                            | .42     |                     |         |         |                     |         |
| 7            | Had very high expectations for him/herself.                                                                                                    |         |                     |         | .47     |                     |         |
| 39           | Was focused on my doing well at school and being responsible and had little interest in my having time for play and pursuing my own interests. |         |                     |         | .43     |                     |         |

Table S1 (Continued)

| RQ1 Item No. | Item Description                                                                                                                   | Father  |                     |         | Mother  |                     |         |
|--------------|------------------------------------------------------------------------------------------------------------------------------------|---------|---------------------|---------|---------|---------------------|---------|
|              |                                                                                                                                    | Loading | Selected for YPI-R2 | Remarks | Loading | Selected for YPI-R2 | Remarks |
|              | <b><i>Emotional Inhibition and Deprivation</i></b>                                                                                 |         |                     |         |         |                     |         |
| 273          | Was uncomfortable expressing affection.                                                                                            | .74     | ✓                   |         | .65     | ✓                   |         |
| 302          | Was private; rarely discussed his/her feelings.                                                                                    | .68     | ✓                   |         | .55     | ✓                   |         |
| 16           | Had a hard time being playful.                                                                                                     | .59     | ✓                   |         | .54     | ✓                   |         |
| 131          | Was uncomfortable expressing his/her feelings to others; even to people s/he knew well.                                            | .58     | ✓                   |         | .50     | ✓                   |         |
| 319          | Did not seem comfortable playing with me.                                                                                          | .55     | ✓                   |         | .54     | ✓                   |         |
| 271          | Felt uncomfortable being silly and child-like.                                                                                     | .50     |                     |         | .44     |                     |         |
| 170          | Did not have a sense of humor.                                                                                                     | .48     | ✓                   |         | .76     | ✓                   |         |
| 154          | Was cold and distant.                                                                                                              | .52     |                     |         | .42     |                     |         |
| 219          | Was not available for cuddling.                                                                                                    | .52     |                     |         | .49     |                     |         |
| 254          | We were emotionally distant and had a hard time understanding each other.                                                          | .52     |                     |         |         |                     |         |
| 90           | I did not feel like I could go to him/her with questions about personal things; I would turn to friends or just keep it to myself. | .49     |                     |         |         |                     |         |
| 66           | Didn't seem to be interested in spending time with me.                                                                             | .44     |                     |         |         |                     |         |
| 112          | Was not interested in spending unplanned time together.                                                                            | .41     |                     |         |         |                     |         |
| 85           | Was too self-conscious to show positive feelings to others even when s/he wanted to.                                               | .41     |                     |         |         |                     |         |
| 233          | Took no interest in my friends.                                                                                                    | .41     |                     |         | .50     |                     |         |
| 84           | Was a loner.                                                                                                                       |         |                     |         | .51     |                     |         |
| 169          | Had no interest in being part of a community.                                                                                      |         |                     |         | .56     |                     |         |
|              | <b><i>Undependability and Irresponsibility</i></b>                                                                                 |         |                     |         |         |                     |         |
| 187          | Was more focused on having fun and relaxing than keeping up with responsibilities.                                                 | .69     | ✓                   |         | .42     | ✓                   |         |
| 12           | Was an undisciplined person.                                                                                                       | .63     | ✓                   |         | .57     | ✓                   |         |
| 392          | Spent too much money and was often in debt.                                                                                        | .58     | ✓                   |         | .44     | ✓                   |         |
| 104          | Was undependable and often did not follow through on plans we made.                                                                | .53     | ✓                   |         | .60     | ✓                   |         |
| 221          | Took money or a possession from me against my wishes to use for him/herself.                                                       | .44     | ✓                   |         | .52     | ✓                   |         |
| 53           | Was unable to handle many daily responsibilities, so I had to do more than my share.                                               | .48     | ✓                   |         | .60     | ✓                   |         |
| 155          | Was an alcoholic or addicted to drugs.                                                                                             | .55     |                     |         | .56     |                     |         |
| 142          | Lied to me, deceived me, or betrayed me.                                                                                           | .45     |                     |         | .51     |                     |         |
| 91           | Abandoned me or left me on an emotional level when I was a child even though he/she was still physically present.                  | .45     |                     |         |         |                     |         |
| 56           | Provided very little discipline or structure for me.                                                                               | .44     |                     |         |         |                     |         |
| 310          | Withdrew or left me alone for extended periods.                                                                                    | .43     |                     |         |         |                     |         |
| 19           | S/he dropped out of school and was not successful at work.                                                                         | .42     |                     |         |         |                     |         |
| 10           | Never taught me the discipline necessary to succeed in school.                                                                     |         |                     |         | .50     |                     |         |
| 45           | Left the house permanently when I was a child and did not keep in touch with me.                                                   |         |                     |         | .62     |                     |         |
| 58           | Would regularly break his/her promises to me.                                                                                      |         |                     |         | .47     |                     |         |
| 65           | I did not respect him/her.                                                                                                         |         |                     |         | .41     |                     |         |
| 70           | Seemed to get pleasure out of hurting me.                                                                                          |         |                     |         | .44     |                     |         |
| 74           | Didn't really want me to succeed.                                                                                                  |         |                     |         | .52     |                     |         |
| 93           | Didn't seem to care what happened to me.                                                                                           |         |                     |         | .43     |                     |         |
| 156          | Used me or took advantage of me.                                                                                                   |         |                     |         | .62     |                     |         |

Table S1 (Continued)

| RQ1 Item No.                                    | Item Description                                                                                          | Father  |                     |         | Mother  |                     |         |
|-------------------------------------------------|-----------------------------------------------------------------------------------------------------------|---------|---------------------|---------|---------|---------------------|---------|
|                                                 |                                                                                                           | Loading | Selected for YPI-R2 | Remarks | Loading | Selected for YPI-R2 | Remarks |
| <b><i>Overprotection and Overindulgence</i></b> |                                                                                                           |         |                     |         |         |                     |         |
| 283                                             | Did a lot of things for me because s/he didn't want me to get hurt.                                       | .66     |                     |         | .43     |                     |         |
| 9                                               | Did too many things for me instead of letting me do things on my own.                                     | .66     | ✓                   |         | .56     | ✓                   |         |
| 123                                             | Overprotected me.                                                                                         | .62     | ✓                   |         | .56     | ✓                   |         |
| 95                                              | If I didn't feel like doing a difficult or unpleasant task, I could usually get him/her to do it for me.  | .61     | ✓                   |         | .50     | ✓                   |         |
| 4                                               | Worried excessively that I would get hurt.                                                                | .45     |                     |         |         |                     |         |
| 48                                              | Worried excessively that I would get sick.                                                                | .45     |                     |         |         |                     |         |
| 371                                             | Spoiled me, or was overindulgent, in many respects.                                                       | .60     | ✓                   |         | .49     | ✓                   |         |
| 305                                             | Treated me as if I was fragile.                                                                           | .52     |                     |         | .46     |                     |         |
| 277                                             | Made many decisions for me because s/he wanted to be sure things would turn out well.                     | .53     |                     |         |         |                     |         |
| 366                                             | Was over-involved in my life.                                                                             | .53     |                     |         | .42     |                     |         |
| 49                                              | Would do my homework for me, if I felt overwhelmed by it.                                                 | .49     |                     |         | .41     |                     |         |
| 311                                             | I always let him/her make choices for me.                                                                 | .46     |                     |         |         |                     |         |
| 50                                              | Has tried to live through me and did not allow me to be free to live my own life.                         | .44     |                     |         |         |                     |         |
| 288                                             | Treated me as if I were younger than I really was.                                                        | .43     |                     |         |         |                     |         |
| <b><i>Punitiveness and Abuse</i></b>            |                                                                                                           |         |                     |         |         |                     |         |
| 203                                             | Would punish me when I did something wrong.                                                               | .83     | ✓                   |         | .65     | ✓                   |         |
| 215                                             | Would punish me harshly when I did something wrong.                                                       | .77     |                     |         | .65     |                     |         |
| 148                                             | He/she relied more on punishment than praise and rewards.                                                 | .49     | ✓                   |         | .45     | ✓                   |         |
| 3                                               | Abused me physically: did things like hitting me or throwing things at me.                                | .49     | ✓                   |         | .60     | ✓                   |         |
| 46                                              | Abused me verbally: did things like calling me names, screaming at me, swearing at me, or threatening me. | .45     | ✓                   |         | .54     | ✓                   |         |
| 129                                             | His/her punishments were often out of proportion with the "crime".                                        | .60     | ✓                   |         |         |                     |         |
| 209                                             | When we disagreed s/he always needed to be right.                                                         | .59     | ✓                   |         |         |                     |         |
| 184                                             | Everything had to be on his/her terms.                                                                    | .56     | ✓                   |         |         |                     |         |
| 168                                             | S/he believed that if you spared the rod you spoiled the child.                                           | .53     | ✓                   |         |         |                     |         |
| 265                                             | If I did what I wanted I was only asking from trouble with him/her.                                       | .45     |                     |         |         |                     |         |
| 263                                             | Had to have everything under control.                                                                     | .42     |                     |         |         |                     |         |
| <b><i>Intrusiveness and Exploitation</i></b>    |                                                                                                           |         |                     |         |         |                     |         |
| 156                                             | Used me or took advantage of me.                                                                          | .48     | ✓                   |         |         |                     |         |
| 70                                              | Seemed to get pleasure out of hurting me.                                                                 | .47     | ✓                   |         |         |                     |         |
| 256                                             | Abused me sexually.                                                                                       | .44     | ✓                   |         |         |                     |         |
| 74                                              | Didn't really want me to succeed.                                                                         | .41     | ✓                   |         |         |                     |         |
| <b><i>Social Exclusion</i></b>                  |                                                                                                           |         |                     |         |         |                     |         |
| 8                                               | Was unhappy a lot and relied on me for support and understanding.                                         | .54     | ✓                   |         |         |                     |         |
| 214                                             | Discouraged me from inviting friends to our house.                                                        | .50     | ✓                   |         |         |                     |         |
| 293                                             | Was critical of my friends.                                                                               | .49     | ✓                   |         |         |                     |         |
| 99                                              | Was often anxious and relied on me for reassurance and support.                                           | .48     | ✓                   |         |         |                     |         |
| 130                                             | Was (seemed to be) jealous of my friends.                                                                 | .47     |                     |         |         |                     |         |
| 5                                               | Made me feel guilty if I did not share everything with him/her.                                           | .41     |                     |         |         |                     |         |



Table S1 (Continued)

| RQ1 Item<br>No. | Item Description                                                                                        | Father  |                           |         | Mother  |                           |         |
|-----------------|---------------------------------------------------------------------------------------------------------|---------|---------------------------|---------|---------|---------------------------|---------|
|                 |                                                                                                         | Loading | Selected<br>for YPI-R2    | Remarks | Loading | Selected<br>for YPI-R2    | Remarks |
|                 | <b><i>Over-Control</i></b>                                                                              |         |                           |         |         |                           |         |
| 389             | Would make me feel guilty if I did not go along with him/her.                                           |         |                           |         | .69     | ✓                         |         |
| 388             | Made me feel guilty if I did not put his/her needs ahead of mine.                                       |         |                           |         | .65     | ✓                         |         |
| 394             | Was demanding; expected to get things his/her way.                                                      |         |                           |         | .51     | ✓                         |         |
| 349             | Put a lot of pressure on me to meet all of my responsibilities.                                         |         |                           |         | .40     | ✓                         |         |
|                 | <b><i>Fear of Harm &amp; Illness</i></b>                                                                |         |                           |         |         |                           |         |
| 178             | Worried about me or him/her being attacked.                                                             |         |                           |         | .53     | ✓                         |         |
| 229             | Worried when making decisions that something terrible would happen if s/he made the wrong choice.       |         |                           |         | .47     | ✓                         |         |
| 257             | Worried about my developing a serious illness even though nothing serious was diagnosed by a physician. |         |                           |         | .46     | ✓                         |         |
| 179             | S/he often thought that something bad was likely to happen to me.                                       |         |                           |         | .45     | ✓                         |         |
| 248             | Would worry that something terrible would happen if I made the wrong choice.                            |         |                           |         | .43     |                           |         |
|                 | <b>Total Number of items<br/>(Factors)</b>                                                              |         | <b>43<br/>(8 factors)</b> |         |         | <b>39<br/>(8 factors)</b> |         |
|                 |                                                                                                         |         |                           |         |         |                           |         |
|                 | Total Number of items selected (Fathers)                                                                |         | 43                        |         |         |                           |         |
|                 | Total Number of items selected (Mothers)                                                                |         | 39                        |         |         |                           |         |
|                 | Minus: Number of overlapped items                                                                       |         | -31                       |         |         |                           |         |
|                 | Final number of items                                                                                   |         | 51                        |         |         |                           |         |
|                 |                                                                                                         |         |                           |         |         |                           |         |
|                 | Additional Items                                                                                        |         | 23                        |         |         |                           |         |
|                 | <b>Total no items for EFA using Singapore sample</b>                                                    |         | <b>74</b>                 |         |         |                           |         |

**Table S2. The 23 Additional Items Added for the EFA Using Singapore and Kuala Lumpur Samples**

| Description of New Items                                                                    | Construct to be Strengthened         |
|---------------------------------------------------------------------------------------------|--------------------------------------|
| 1. When s/he held me it often felt smothering.                                              | Intrusiveness and Exploitation       |
| 2. When s/he touched me it often felt intrusive.                                            | Intrusiveness and Exploitation       |
| 3. Touched or held me in ways that made me feel uncomfortable or uneasy.                    | Intrusiveness and Exploitation       |
| 4. Left me too much on my own to make important decisions and figure things out.            | Overindulgence                       |
| 5. Did not help me think through the consequences of my choices.                            | Overindulgence                       |
| 6. Left me on my own to set goals and follow through on tasks.                              | Overindulgence                       |
| 7. Set few rules or responsibilities for me.                                                | Overindulgence                       |
| 8. Usually let me get my way.                                                               | Overindulgence                       |
| 9. Put me on a pedestal.                                                                    | Overindulgence                       |
| 10. I could usually talk him/her into letting me do or have what I wanted.                  | Overindulgence                       |
| 11. If I didn't feel like helping out around the house, s/he would overlook it.             | Overindulgence                       |
| 12. Usually put my needs ahead of everyone else's.                                          | Overindulgence                       |
| 13. Usually gave me whatever I wanted for fear that I would be angry or unhappy.            | Overindulgence                       |
| 14. Pressured me to follow through on tasks.                                                | Over-Control                         |
| 15. Wanted a lot of input on the goals I set.                                               | Over-Control                         |
| 16. Set a lot of rules and responsibilities for me.                                         | Over-Control                         |
| 17. Kept our family isolated from others.                                                   | Social Exclusion                     |
| 18. Was a loner.                                                                            | Social Exclusion                     |
| 19. Had no interest in being part of a community.                                           | Social Exclusion                     |
| 20. Believed it was more important for me to gain wealth and status than be true to myself. | Competitiveness and Status Seeking   |
| 21. Never taught me the discipline necessary to succeed in school.                          | Undependability and Irresponsibility |
| 22. Left the house permanently when I was a child and did not keep in touch with me.        | Undependability and Irresponsibility |
| 23. Provided very little discipline or structure for me.                                    | Undependability and Irresponsibility |

**Table S3. EFA Singapore and Kuala Lumpur Samples (Singapore Father,  $n = 592$ ; Singapore Mother,  $n = 628$ ; Kuala Lumpur Father,  $n = 222$ ; Kuala Lumpur Mother,  $n = 229$ )**

| RQRN Item No. | Item Description                                                                        | Father    |              | Mother    |              | Item Selected for<br>YPI-R3 |
|---------------|-----------------------------------------------------------------------------------------|-----------|--------------|-----------|--------------|-----------------------------|
|               |                                                                                         | Singapore | Kuala Lumpur | Singapore | Kuala Lumpur |                             |
|               | <b><i>Over-Control</i></b>                                                              |           |              |           |              |                             |
| RQRN 58       | When we disagreed s/he always needed to be right.                                       | .880      |              | .734      |              | ✓                           |
| RQRN 38       | Everything had to be on his/her terms.                                                  | .805      |              | .790      |              | ✓                           |
| RQRN 31       | Was demanding; expected to get things his/her way.                                      | .799      |              | .737      |              | ✓                           |
| RQRN 68       | Would make me feel guilty if I did not go along with him/her.                           | .750      |              | .623      |              | ✓                           |
| RQRN 69       | Would call me names (like “stupid” or “idiot”) when I made mistakes.                    | .716      |              | .865      |              |                             |
| RQRN 17       | Made me feel guilty if I did not put his/her needs ahead of mine.                       | .651      |              |           |              | ✓                           |
| RQRN 35       | Put a lot of pressure on me to meet all of my responsibilities.                         | .641      |              |           |              | ✓                           |
|               | <b><i>Emotional Inhibition &amp; Deprivation</i></b>                                    |           |              |           |              |                             |
| RQRN 43       | Had a hard time being playful.                                                          | .748      |              | .888      | .676         | ✓                           |
| RQRN 7        | Was uncomfortable expressing affection.                                                 | .693      |              |           | .595         | ✓                           |
| RQRN 42       | Did not have a sense of humor.                                                          | .686      |              | .777      | .551         | ✓                           |
| RQRN 16       | Was private; rarely discussed his/her feelings.                                         | .613      |              |           | .414         | ✓                           |
| RQRN 48       | Was uncomfortable expressing his/her feelings to others; even to people s/he knew well. | .531      |              |           | .498         | ✓                           |
| RQRN 27       | Did not seem comfortable playing with me.                                               | .492      |              |           |              | ✓                           |
|               | <b><i>Undependability and Irresponsibility</i></b>                                      |           |              |           |              |                             |
| RQRN 37       | Spent too much money and was often in debt.                                             | .828      | .694         | .674      | .747         | ✓                           |
| RQRN 45       | Was an undisciplined person.                                                            | .713      | .735         | .571      | .724         | ✓                           |
| RQRN 33       | Was undependable and often did not follow through on plans we made.                     | .488      | .531         |           | .533         | ✓                           |
| RQRN 40       | Was more focused on having fun and relaxing than keeping up with responsibilities.      | .479      | .536         |           |              | ✓                           |
| RQRN 41       | Took money or a possession from me against my wishes to use for him/herself.            | .406      |              | .458      |              | ✓                           |

Table S3 (Continued)

| RQRN Item No.                                    | Item Description                                                                                         | Father    |              | Mother    |              | Item Selected for<br>YPI-R3 |
|--------------------------------------------------|----------------------------------------------------------------------------------------------------------|-----------|--------------|-----------|--------------|-----------------------------|
|                                                  |                                                                                                          | Singapore | Kuala Lumpur | Singapore | Kuala Lumpur |                             |
| <b><i>Overprotection and Overindulgence</i></b>  |                                                                                                          |           |              |           |              |                             |
| RQRN 29                                          | If I didn't feel like doing a difficult or unpleasant task, I could usually get him/her to do it for me. | .681      | .604         | .564      | .635         | ✓                           |
| RQRN 51                                          | Did too many things for me instead of letting me do things on my own.                                    | .613      | .526         | .656      | .667         | ✓                           |
| RQRN 59                                          | Spoiled me, or was overindulgent, in many respects.                                                      | .600      | .793         | .752      | .581         | ✓                           |
| RQRN 30                                          | I could usually talk him/her into letting me do or have what I wanted.                                   | .559      |              |           |              | ✓                           |
| RQRN 63                                          | Overprotected me.                                                                                        | .503      | .486         | .510      | .448         | ✓                           |
| RQRN 65                                          | Usually gave me whatever I wanted for fear that I would be angry or unhappy.                             | .503      | .627         | .573      | .461         | ✓                           |
| <b><i>Neglect and Insufficient Guidance</i></b>  |                                                                                                          |           |              |           |              |                             |
| RQRN 44                                          | Left me on my own to set goals and follow through on tasks.                                              | .832      | .503         | .575      |              | ✓                           |
| RQRN 56                                          | Left me too much on my own to make important decisions and figure things out.                            | .741      | .530         | .824      |              | ✓                           |
| RQRN 25                                          | Usually let me get my way.                                                                               | .424      | .698         |           |              | ✓                           |
| RQRN24                                           | Never taught me the discipline necessary to succeed in school.                                           |           | .519         | .480      |              | ✓                           |
| RQRN13                                           | Provided very little discipline or structure for me.                                                     |           | .512         | .437      |              | ✓                           |
| <b><i>Competitiveness and Status Seeking</i></b> |                                                                                                          |           |              |           |              |                             |
| RQRN 3                                           | Placed strong emphasis on success and competition.                                                       | .761      | .783         | .671      | .854         | ✓                           |
| RQRN 9                                           | Put a lot of emphasis on my getting good grades and getting ahead in life.                               | .616      | .861         | .627      | .936         | ✓                           |
| RQRN 21                                          | Believed that if I was smarter or more talented it made me superior to others who were less so.          | .481      | .640         | .459      | .777         | ✓                           |
| RQRN36                                           | Was concerned with social status and appearance.                                                         |           | .695         | .585      | .693         | ✓                           |

Table S3 (Continued)

| RQRN Item No. | Item Description                                                                                          | Father    |              | Mother    |              | Item Selected for YPI-R3 |
|---------------|-----------------------------------------------------------------------------------------------------------|-----------|--------------|-----------|--------------|--------------------------|
|               |                                                                                                           | Singapore | Kuala Lumpur | Singapore | Kuala Lumpur |                          |
|               | <b><i>Fear of Harm and Illness</i></b>                                                                    |           |              |           |              |                          |
| RQRN 62       | Was often anxious and relied on me for reassurance and support.                                           | .710      | .551         |           | .643         | ✓                        |
| RQRN 52       | Was unhappy a lot and relied on me for support and understanding.                                         | .525      |              |           | .455         | ✓                        |
| RQRN 10       | Worried about me or him/her being attacked.                                                               | .519      | .639         | .727      | .480         | ✓                        |
| RQRN 50       | Worried about my developing a serious illness even though nothing serious was diagnosed by a physician.   | .492      | .665         | .741      | .558         | ✓                        |
| RQRN 22       | Worried when making decisions that something terrible would happen if s/he made the wrong choice.         | .472      | .463         | .449      |              | ✓                        |
| RQRN 61       | S/he often thought that something bad was likely to happen to me.                                         |           | .484         | .475      |              | ✓                        |
|               | <b><i>Intrusiveness and Exploitation</i></b>                                                              |           |              |           |              |                          |
| RQRN 67       | Touched or held me in ways that made me feel uncomfortable or uneasy.                                     | .711      |              | .648      | .681         | ✓                        |
| RQRN 14       | When s/he touched me it often felt intrusive.                                                             | .631      |              | .776      | .476         | ✓                        |
| RQRN 11       | Abused me sexually.                                                                                       | .419      |              |           | .592         | ✓                        |
| RQRN 15       | Used me or took advantage of me.                                                                          | .408      |              |           | .420         | ✓                        |
| RQRN 20       | Seemed to get pleasure out of hurting me.                                                                 |           |              |           | .613         | ✓                        |
|               | <b><i>Degradation and Rejection</i></b>                                                                   |           |              |           |              |                          |
| RQRN 74       | Saw me as lacking common sense.                                                                           | .622      | .601         |           |              | ✓                        |
| RQRN 12       | Saw me as having little to contribute.                                                                    | .585      |              |           |              | ✓                        |
| RQRN 18       | Treated me as if I was stupid or untalented.                                                              | .578      | .694         |           |              | ✓                        |
| RQRN 26       | Made me feel unloved or rejected.                                                                         |           |              |           |              | ✓                        |
| RQRN 1        | Put me down and made me feel ashamed of myself if I didn't do well.                                       |           | .655         |           |              | ✓                        |
| RQRN 69       | Would call me names (like "stupid" or "idiot") when I made mistakes.                                      |           | .816         |           |              | ✓                        |
|               | <b><i>Social Exclusion</i></b>                                                                            |           |              |           |              |                          |
| RQRN 55       | Was a loner.                                                                                              | .783      | .747         | .687      |              | ✓                        |
| RQRN 71       | Had no interest in being part of a community.                                                             | .693      | .472         | .614      | .458         | ✓                        |
| RQRN 4        | Kept our family isolated from others.                                                                     | .609      | .481         | .466      | .626         | ✓                        |
|               | <b><i>Punitiveness and Abuse</i></b>                                                                      |           |              |           |              |                          |
| RQRN 19       | Would punish me when I did something wrong.                                                               | .496      | .703         | .510      | .702         | ✓                        |
| RQRN 5        | S/he believed that if you spared the rod you spoiled the child.                                           | .489      |              | .566      | .779         | ✓                        |
| RQRN 28       | He/she relied more on punishment than praise and rewards.                                                 | .419      |              |           | .489         | ✓                        |
| RQRN 47       | Abused me verbally: did things like calling me names, screaming at me, swearing at me, or threatening me. |           | 1.129        |           | .714         | ✓                        |
| RQRN 34       | Abused me physically: did things like hitting me or throwing things at me.                                |           | .694         |           | .659         | ✓                        |

Note. Total number of items = 57, Total number of subscales = 11; Final number of items selected = 41, Final number of subscales = 10

57 items

**Table S4. Correlation between YPI-R3 and 18 Negative Schemas Using Fathers Sample from USA (*n*=259)**

|                           | <b>OC</b> | <b>EID</b> | <b>UI</b> | <b>OO</b> | <b>NIG</b> | <b>CSS</b> | <b>IE</b> | <b>DR</b> | <b>SE</b> | <b>PA</b> |
|---------------------------|-----------|------------|-----------|-----------|------------|------------|-----------|-----------|-----------|-----------|
| Abandonment               | .159*     | .021       | .223**    | .225**    | .185**     | .032       | .145*     | .139*     | .073      | .090      |
| Approvalseeking           | .129*     | .143*      | .121      | .252**    | .149*      | .162**     | .072      | .124*     | .130*     | .068      |
| Defectiveness             | .119      | .133*      | .081      | .159*     | .131*      | .022       | .129*     | .209**    | .153*     | .180**    |
| Dependence                | .064      | .091       | .148*     | .234**    | .145*      | -.057      | .105      | .116      | .064      | .062      |
| Emotionaldeprivation      | .169**    | .127*      | .099      | .114      | .135*      | .081       | .177**    | .160*     | .199**    | .141*     |
| Emotionalinhibition       | .007      | .161**     | .065      | .159*     | .189**     | .059       | .071      | .020      | .190**    | .005      |
| Enmeshment                | .062      | -.042      | .049      | .199**    | .003       | -.058      | .090      | .045      | .048      | -.013     |
| Entitlement               | .006      | .008       | .129*     | .263**    | .082       | .066       | .028      | -.040     | .025      | -.040     |
| Failure                   | .099      | .103       | .136*     | .146*     | .137*      | -.090      | .079      | .106      | .087      | .057      |
| Insufficient Self-Control | .073      | .143*      | .179**    | .258**    | .262**     | -.023      | .128*     | .098      | .170**    | .088      |
| Mistrust                  | .117      | .096       | .181**    | .193**    | .175**     | .071       | .092      | .120      | .125*     | .099      |
| Pessimism                 | .174**    | .118       | .227**    | .143*     | .213**     | .115       | .162**    | .141*     | .186**    | .138*     |
| Puniiveness               | .127*     | .110       | .046      | .111      | .092       | .120       | .064      | .081      | .103      | .080      |
| Selsacrifice              | .075      | .063       | .128*     | .133*     | .084       | .109       | -.012     | .007      | .076      | -.011     |
| SocialIsolation           | .128*     | .152*      | .108      | .174**    | .143*      | .012       | .018      | .128*     | .198**    | .094      |
| Subjugation               | .077      | .138*      | .167**    | .131*     | .180**     | .031       | .033      | .065      | .218**    | .037      |
| Unrelenting Standards     | .125*     | .118       | .052      | .100      | .025       | .191**     | -.050     | .007      | .121      | .031      |
| Vulnerability             | .158*     | .090       | .165**    | .164**    | .195**     | .096       | .151*     | .129*     | .150*     | .123*     |

OC = Over-Control; EID = Emotional Inhibition and Deprivation; UI = Undependability and Irresponsibility; OO = Overprotection and Overindulgence; NIG – Neglect and Insufficient Guidance; CSS = Competitiveness and Status Seeking; IE = Intrusiveness and Exploitation; DR = Degradation and Rejection; SE = Social Exclusion; PA = Punitiveness and Abuse

**Table S5. Correlation between YPI-R3 and 18 Negative Schemas Using Fathers Sample from South Africa (*n*=318)**

|                           | <b>OC</b> | <b>EID</b> | <b>UI</b> | <b>OO</b> | <b>NIG</b> | <b>CSS</b> | <b>IE</b> | <b>DR</b> | <b>SE</b> | <b>PA</b> |
|---------------------------|-----------|------------|-----------|-----------|------------|------------|-----------|-----------|-----------|-----------|
| Abandonment               | .121*     | .083       | .180**    | .258**    | .192**     | .162**     | .150**    | .174**    | .094      | .117*     |
| Approvalseeking           | .171**    | .184**     | .168**    | .223**    | .184**     | .175**     | .163**    | .154**    | .129*     | .115*     |
| Defectiveness             | .267**    | .291**     | .279**    | .247**    | .305**     | .110*      | .308**    | .299**    | .267**    | .264**    |
| Dependence                | .194**    | .220**     | .224**    | .262**    | .254**     | .178**     | .147**    | .275**    | .149**    | .157**    |
| Emotionaldeprivation      | .172**    | .226**     | .216**    | .152**    | .277**     | .111*      | .196**    | .213**    | .224**    | .209**    |
| Emotionalinhibition       | .203**    | .284**     | .129*     | .204**    | .172**     | .144*      | .097      | .167**    | .246**    | .146**    |
| Enmeshment                | .143*     | .127*      | .226**    | .244**    | .194**     | .169**     | .200**    | .256**    | .077      | .141*     |
| Entitlement               | .163**    | .150**     | .129*     | .301**    | .147**     | .215**     | .117*     | .167**    | .110      | .158**    |
| Failure                   | .170**    | .209**     | .232**    | .219**    | .290**     | .100       | .168**    | .275**    | .223**    | .181**    |
| Insufficient Self-Control | .189**    | .223**     | .180**    | .299**    | .280**     | .167**     | .085      | .180**    | .186**    | .161**    |
| Mistrust                  | .246**    | .181**     | .222**    | .271**    | .258**     | .173**     | .224**    | .237**    | .250**    | .212**    |
| Pessimism                 | .208**    | .223**     | .227**    | .237**    | .251**     | .188**     | .189**    | .213**    | .220**    | .186**    |
| Puniiveness               | .291**    | .240**     | .207**    | .205**    | .294**     | .171**     | .221**    | .263**    | .255**    | .228**    |
| Selfsacrifice             | .170**    | .159**     | .216**    | .234**    | .190**     | .154**     | .078      | .168**    | .171**    | .108      |
| SocialIsolation           | .246**    | .267**     | .163**    | .192**    | .276**     | .095       | .167**    | .212**    | .287**    | .198**    |
| Subjugation               | .246**    | .218**     | .246**    | .247**    | .287**     | .150**     | .192**    | .233**    | .209**    | .145**    |
| Unrelenting Standards     | .292**    | .150**     | .133*     | .222**    | .155**     | .309**     | .160**    | .206**    | .150**    | .184**    |
| Vulnerability             | .287**    | .220**     | .309**    | .190**    | .222**     | .199**     | .255**    | .242**    | .188**    | .226**    |

OC = Over-Control; EID = Emotional Inhibition and Deprivation; UI = Undependability and Irresponsibility; OO = Overprotection and Overindulgence; NIG – Neglect and Insufficient Guidance; CSS = Competitiveness and Status Seeking; IE = Intrusiveness and Exploitation; DR = Degradation and Rejection; SE = Social Exclusion; PA = Punitiveness and Abuse

**Table S6. Correlation between YPI-R3 and 18 Negative Schemas Using Fathers Sample from Nigeria (*n*=328)**

|                           | <b>OC</b> | <b>EID</b> | <b>UI</b> | <b>OO</b> | <b>NIG</b> | <b>CSS</b> | <b>IE</b> | <b>DR</b> | <b>SE</b> | <b>PA</b> |
|---------------------------|-----------|------------|-----------|-----------|------------|------------|-----------|-----------|-----------|-----------|
| Abandonment               | .195**    | .155**     | .258**    | .314**    | .253**     | .255**     | .306**    | .184**    | .221**    | .115*     |
| Approvalseeking           | .192**    | .183**     | .263**    | .238**    | .238**     | .267**     | .265**    | .185**    | .159**    | .102      |
| Defectiveness             | .191**    | .226**     | .268**    | .352**    | .269**     | .226**     | .310**    | .227**    | .269**    | .112*     |
| Dependence                | .212**    | .202**     | .266**    | .359**    | .286**     | .194**     | .277**    | .179**    | .303**    | .130*     |
| Emotionaldeprivation      | .231**    | .295**     | .298**    | .215**    | .364**     | .163**     | .310**    | .251**    | .272**    | .218**    |
| Emotionalinhibition       | .253**    | .311**     | .320**    | .262**    | .332**     | .184**     | .325**    | .312**    | .326**    | .202**    |
| Enmeshment                | .208**    | .171**     | .269**    | .347**    | .217**     | .241**     | .321**    | .210**    | .242**    | .115*     |
| Entitlement               | .256**    | .260**     | .258**    | .282**    | .276**     | .277**     | .264**    | .191**    | .263**    | .175**    |
| Failure                   | .197**    | .143**     | .215**    | .339**    | .213**     | .209**     | .280**    | .179**    | .216**    | .111*     |
| Insufficient Self-Control | .176**    | .237**     | .242**    | .288**    | .307**     | .228**     | .254**    | .201**    | .262**    | .147**    |
| Mistrust                  | .236**    | .209**     | .274**    | .252**    | .310**     | .267**     | .245**    | .215**    | .259**    | .161**    |
| Pessimism                 | .219**    | .200**     | .271**    | .289**    | .261**     | .295**     | .259**    | .206**    | .252**    | .132*     |
| Puniiveness               | .186**    | .127*      | .231**    | .285**    | .202**     | .244**     | .244**    | .188**    | .185**    | .105      |
| Selsacrifice              | .108      | .111*      | .171**    | .150**    | .212**     | .159**     | .139*     | .103      | .205**    | .058      |
| SocialIsolation           | .229**    | .266**     | .265**    | .259**    | .343**     | .185**     | .290**    | .221**    | .334**    | .166**    |
| Subjugation               | .273**    | .227**     | .284**    | .312**    | .276**     | .309**     | .334**    | .263**    | .288**    | .183**    |
| Unrelenting Standards     | .226**    | .190**     | .194**    | .205**    | .231**     | .285**     | .168**    | .144**    | .202**    | .140*     |
| Vulnerability             | .222**    | .251**     | .262**    | .258**    | .258**     | .215**     | .256**    | .219**    | .258**    | .189**    |

OC = Over-Control; EID = Emotional Inhibition and Deprivation; UI = Undependability and Irresponsibility; OO = Overprotection and Overindulgence; NIG – Neglect and Insufficient Guidance; CSS = Competitiveness and Status Seeking; IE = Intrusiveness and Exploitation; DR = Degradation and Rejection; SE = Social Exclusion; PA = Punitiveness and Abuse



**Table S7. Correlation between YPI-R3 and 18 Negative Schemas Using Fathers Sample from India (n=277)**

|                           | OC     | EID    | UI     | OO     | NIG    | CSS    | IE     | DR     | SE     | PA     |
|---------------------------|--------|--------|--------|--------|--------|--------|--------|--------|--------|--------|
| Abandonment               | .320** | .161** | .403** | .372** | .236** | .241** | .444** | .246** | .233** | .188** |
| Approvalseeking           | .256** | .152*  | .259** | .308** | .245** | .233** | .213** | .173** | .135*  | .100   |
| Defectiveness             | .244** | .180** | .344** | .377** | .189** | .218** | .372** | .261** | .233** | .140*  |
| Dependence                | .239** | .170** | .402** | .388** | .243** | .188** | .408** | .260** | .196** | .189** |
| Emotionaldeprivation      | .211** | .213** | .249** | .173** | .164** | .140*  | .327** | .202** | .195** | .126*  |
| Emotionalinhibition       | .221** | .171** | .250** | .274** | .116   | .165** | .238** | .128*  | .272** | .135*  |
| Enmeshment                | .269** | .070   | .451** | .511** | .156** | .205** | .442** | .233** | .251** | .182** |
| Entitlement               | .241** | .123*  | .263** | .337** | .078   | .209** | .270** | .191** | .203** | .095   |
| Failure                   | .258** | .223** | .318** | .348** | .244** | .197** | .339** | .307** | .227** | .147*  |
| Insufficient Self-Control | .230** | .149*  | .259** | .328** | .197** | .155** | .256** | .177** | .107   | .089   |
| Mistrust                  | .268** | .210** | .408** | .346** | .226** | .205** | .320** | .205** | .348** | .207** |
| Pessimism                 | .252** | .118*  | .313** | .251** | .160** | .167** | .259** | .180** | .165** | .144*  |
| Puniiveness               | .202** | .085   | .258** | .285** | .177** | .219** | .249** | .184** | .142*  | .121*  |
| Selsacrifice              | .154*  | .064   | .217** | .220** | .100   | .142*  | .159** | .056   | .213** | .083   |
| SocialIsolation           | .255** | .250** | .360** | .287** | .184** | .175** | .337** | .233** | .290** | .173** |
| Subjugation               | .243** | .116   | .324** | .349** | .222** | .151*  | .306** | .246** | .192** | .123*  |
| Unrelenting Standards     | .250** | .184** | .270** | .253** | .164** | .250** | .258** | .175** | .295** | .148*  |
| Vulnerability             | .212** | .139*  | .298** | .346** | .116   | .149*  | .304** | .172** | .198** | .137*  |

OC = Over-Control; EID = Emotional Inhibition and Deprivation; UI = Undependability and Irresponsibility; OO = Overprotection and Overindulgence; NIG – Neglect and Insufficient Guidance; CSS = Competitiveness and Status Seeking; IE = Intrusiveness and Exploitation; DR = Degradation and Rejection; SE = Social Exclusion; PA = Punitiveness and Abuse

**Table S8. Correlation between YPI-R3 and 18 Negative Schemas Using Mothers Sample from USA (n=281)**

|                           | <b>OC</b> | <b>EID</b> | <b>UI</b> | <b>OO</b> | <b>IGN</b> | <b>CSS</b> | <b>IE</b> | <b>DR</b> | <b>SE</b> | <b>PA</b> |
|---------------------------|-----------|------------|-----------|-----------|------------|------------|-----------|-----------|-----------|-----------|
| Abandonment               | .272**    | .126*      | .234**    | .238**    | .195**     | .048       | .233**    | .253**    | .132*     | .196**    |
| Approvalseeking           | .176**    | .151*      | .175**    | .254**    | .164**     | .198**     | .034      | .139*     | .107      | .050      |
| Defectiveness             | .222**    | .187**     | .229**    | .155**    | .233**     | .090       | .233**    | .236**    | .231**    | .193**    |
| Dependence                | .158**    | .175**     | .147*     | .234**    | .202**     | .026       | .191**    | .231**    | .153*     | .135*     |
| Emotionaldeprivation      | .167**    | .186**     | .206**    | .112      | .233**     | .192**     | .219**    | .250**    | .206**    | .182**    |
| Emotionalinhibition       | .162**    | .270**     | .141*     | .208**    | .245**     | .148*      | .124*     | .105      | .165**    | .067      |
| Enmeshment                | .168**    | .125*      | .158**    | .259**    | .141*      | .045       | .257**    | .201**    | .171**    | .095      |
| Entitlement               | .102      | .072       | .084      | .235**    | .120*      | .161**     | .077      | .104      | .076      | .004      |
| Failure                   | .186**    | .146*      | .163**    | .142*     | .226**     | -.019      | .201**    | .236**    | .175**    | .128*     |
| Insufficient Self-Control | .304**    | .224**     | .292**    | .312**    | .320**     | .131*      | .266**    | .353**    | .261**    | .214**    |
| Mistrust                  | .300**    | .201**     | .168**    | .165**    | .194**     | .199**     | .177**    | .253**    | .229**    | .221**    |
| Pessimism                 | .295**    | .177**     | .209**    | .176**    | .231**     | .166**     | .219**    | .269**    | .236**    | .185**    |
| Puniiveness               | .275**    | .174**     | .129*     | .130*     | .179**     | .195**     | .178**    | .224**    | .158**    | .149*     |
| Selfsacrifice             | .287**    | .151*      | .123*     | .193**    | .111       | .120*      | .059      | .115      | .105      | .109      |
| SocialIsolation           | .282**    | .196**     | .182**    | .255**    | .208**     | .179**     | .134*     | .198**    | .218**    | .130*     |
| Subjugation               | .264**    | .178**     | .125*     | .278**    | .160**     | .134*      | .134*     | .166**    | .186**    | .123*     |
| Unrelenting Standards     | .208**    | .146*      | .039      | .193**    | .055       | .232**     | .014      | .088      | .118*     | -.001     |
| Vulnerability             | .256**    | .168**     | .221**    | .208**    | .232**     | .152*      | .291**    | .276**    | .231**    | .183**    |

\*\* . Correlation is significant at the 0.01 level (2-tailed).

\* . Correlation is significant at the 0.05 level (2-tailed).

OC = Over-Control; EID = Emotional Inhibition and Deprivation; UI = Undependability and Irresponsibility; OO = Overprotection and Overindulgence; NIG – Neglect and Insufficient Guidance; CSS = Competitiveness and Status Seeking; IE = Intrusiveness and Exploitation; DR = Degradation and Rejection; SE = Social Exclusion; PA = Punitiveness and Abuse

**Table S9. Correlation between YPI-R3 and 18 Negative Schemas Using Mothers Sample from South Africa (*n*= 372)**

|                           | <b>OC</b> | <b>EID</b> | <b>UI</b> | <b>OO</b> | <b>IGN</b> | <b>CSS</b> | <b>IE</b> | <b>DR</b> | <b>SE</b> | <b>PA</b> |
|---------------------------|-----------|------------|-----------|-----------|------------|------------|-----------|-----------|-----------|-----------|
| Abandonment               | .247**    | .183**     | .266**    | .202**    | .274**     | .203**     | .320**    | .292**    | .273**    | .227**    |
| Approvalseeking           | .189**    | .142**     | .197**    | .271**    | .191**     | .205**     | .144**    | .189**    | .196**    | .123*     |
| Defectiveness             | .285**    | .258**     | .335**    | .238**    | .360**     | .188**     | .370**    | .359**    | .338**    | .272**    |
| Dependence                | .220**    | .172**     | .324**    | .282**    | .325**     | .188**     | .302**    | .265**    | .171**    | .205**    |
| Emotionaldeprivation      | .308**    | .283**     | .297**    | .175**    | .352**     | .192**     | .386**    | .308**    | .324**    | .299**    |
| Emotionalinhibition       | .265**    | .279**     | .194**    | .235**    | .245**     | .239**     | .206**    | .203**    | .270**    | .217**    |
| Enmeshment                | .264**    | .101       | .300**    | .356**    | .280**     | .195**     | .293**    | .252**    | .164**    | .221**    |
| Entitlement               | .211**    | .175**     | .224**    | .300**    | .235**     | .231**     | .155**    | .162**    | .246**    | .144**    |
| Failure                   | .231**    | .150**     | .309**    | .244**    | .357**     | .145**     | .264**    | .310**    | .220**    | .234**    |
| Insufficient Self-Control | .191**    | .146**     | .235**    | .339**    | .293**     | .178**     | .144**    | .165**    | .204**    | .164**    |
| Mistrust                  | .312**    | .157**     | .298**    | .275**    | .319**     | .207**     | .285**    | .294**    | .321**    | .246**    |
| Pessimism                 | .218**    | .125*      | .252**    | .297**    | .263**     | .184**     | .209**    | .204**    | .165**    | .129*     |
| Punitiveness              | .303**    | .198**     | .298**    | .228**    | .312**     | .240**     | .278**    | .297**    | .265**    | .209**    |
| Selfsacrifice             | .219**    | .146**     | .234**    | .251**    | .191**     | .217**     | .171**    | .177**    | .197**    | .134**    |
| SocialIsolation           | .268**    | .237**     | .259**    | .222**    | .314**     | .181**     | .264**    | .258**    | .339**    | .201**    |
| Subjugation               | .241**    | .169**     | .281**    | .356**    | .292**     | .213**     | .229**    | .206**    | .258**    | .148**    |
| Unrelenting Standards     | .335**    | .222**     | .215**    | .237**    | .229**     | .337**     | .166**    | .219**    | .221**    | .209**    |
| Vulnerability             | .246**    | .157**     | .282**    | .203**    | .264**     | .173**     | .266**    | .256**    | .142**    | .181**    |

\*\* . Correlation is significant at the 0.01 level (2-tailed).

\* . Correlation is significant at the 0.05 level (2-tailed).

OC = Over-Control; EID = Emotional Inhibition and Deprivation; UI = Undependability and Irresponsibility; OO = Overprotection and Overindulgence; NIG – Neglect and Insufficient Guidance; CSS = Competitiveness and Status Seeking; IE = Intrusiveness and Exploitation; DR = Degradation and Rejection; SE = Social Exclusion; PA = Punitiveness and Abuse

**Table S10. Correlation between YPI-R3 and 18 Negative Schemas using Mothers Sample from Nigeria (*n*= 344)**

|                           | OC     | EID    | UI     | OO     | IGN    | CSS    | IE     | DR     | SE     | PA     |
|---------------------------|--------|--------|--------|--------|--------|--------|--------|--------|--------|--------|
| Abandonment               | .205** | .169** | .259** | .364** | .241** | .332** | .299** | .192** | .297** | .135*  |
| Approvalseeking           | .208** | .186** | .190** | .317** | .182** | .358** | .252** | .185** | .278** | .149** |
| Defectiveness             | .237** | .226** | .305** | .317** | .213** | .239** | .324** | .213** | .356** | .192** |
| Dependence                | .157** | .173** | .291** | .339** | .234** | .203** | .308** | .196** | .334** | .134*  |
| Emotionaldeprivation      | .186** | .166** | .296** | .260** | .229** | .215** | .262** | .164** | .247** | .124*  |
| Emotionalinhibition       | .246** | .346** | .265** | .292** | .291** | .257** | .291** | .238** | .372** | .179** |
| Enmeshment                | .238** | .211** | .293** | .279** | .219** | .277** | .359** | .227** | .355** | .219** |
| Entitlement               | .204** | .173** | .217** | .327** | .165** | .317** | .260** | .160** | .380** | .169** |
| Failure                   | .214** | .205** | .245** | .363** | .257** | .259** | .303** | .198** | .357** | .162** |
| Insufficient Self-Control | .216** | .231** | .286** | .317** | .275** | .264** | .300** | .233** | .329** | .171** |
| Mistrust                  | .205** | .176** | .225** | .301** | .226** | .258** | .258** | .187** | .269** | .169** |
| Pessimism                 | .244** | .254** | .234** | .315** | .200** | .332** | .264** | .204** | .325** | .162** |
| Punitive                  | .242** | .162** | .236** | .279** | .207** | .354** | .293** | .170** | .268** | .159** |
| Self-sacrifice            | .164** | .120*  | .141** | .220** | .072   | .201** | .175** | .117*  | .173** | .166** |
| Social Isolation          | .247** | .268** | .324** | .315** | .228** | .212** | .279** | .198** | .364** | .151** |
| Subjugation               | .258** | .225** | .293** | .314** | .207** | .302** | .297** | .196** | .327** | .160** |
| Unrelenting Standards     | .214** | .155** | .132*  | .265** | .143** | .311** | .151** | .109*  | .267** | .159** |
| Vulnerability             | .170** | .238** | .255** | .327** | .241** | .204** | .243** | .192** | .337** | .140** |

\*\* . Correlation is significant at the 0.01 level (2-tailed).

\* . Correlation is significant at the 0.05 level (2-tailed).

OC = Over-Control; EID = Emotional Inhibition and Deprivation; UI = Undependability and Irresponsibility; OO = Overprotection and Overindulgence; NIG – Neglect and Insufficient Guidance; CSS = Competitiveness and Status Seeking; IE = Intrusiveness and Exploitation; DR = Degradation and Rejection; SE = Social Exclusion; PA = Punitiveness and Abuse

**Table S11. Correlation between YPI-R3 and 18 Negative Schemas using Mothers Sample from India (n= 289)**

|                           | <b>OC</b> | <b>EID</b> | <b>UI</b> | <b>OO</b> | <b>IGN</b> | <b>CSS</b> | <b>IE</b> | <b>DR</b> | <b>SE</b> | <b>PA</b> |
|---------------------------|-----------|------------|-----------|-----------|------------|------------|-----------|-----------|-----------|-----------|
| Abandonment               | .307**    | .232**     | .413**    | .372**    | .271**     | .285**     | .408**    | .323**    | .295**    | .255**    |
| Approvalseeking           | .221**    | .189**     | .295**    | .288**    | .222**     | .264**     | .210**    | .196**    | .174**    | .161**    |
| Defectiveness             | .293**    | .337**     | .411**    | .324**    | .289**     | .265**     | .420**    | .423**    | .300**    | .275**    |
| Dependence                | .268**    | .250**     | .414**    | .346**    | .319**     | .235**     | .422**    | .387**    | .269**    | .238**    |
| Emotionaldeprivation      | .239**    | .315**     | .321**    | .224**    | .257**     | .179**     | .318**    | .319**    | .315**    | .248**    |
| Emotionalinhibition       | .169**    | .200**     | .301**    | .283**    | .228**     | .166**     | .266**    | .148*     | .254**    | .189**    |
| Enmeshment                | .274**    | .221**     | .424**    | .419**    | .245**     | .161**     | .443**    | .283**    | .373**    | .231**    |
| Entitlement               | .279**    | .293**     | .357**    | .331**    | .173**     | .230**     | .246**    | .194**    | .226**    | .217**    |
| Failure                   | .292**    | .297**     | .344**    | .292**    | .260**     | .170**     | .371**    | .357**    | .299**    | .247**    |
| Insufficient Self-Control | .253**    | .261**     | .384**    | .345**    | .294**     | .249**     | .261**    | .247**    | .234**    | .198**    |
| Mistrust                  | .349**    | .276**     | .412**    | .334**    | .257**     | .306**     | .355**    | .289**    | .307**    | .291**    |
| Pessimism                 | .276**    | .208**     | .374**    | .248**    | .249**     | .231**     | .258**    | .254**    | .258**    | .202**    |
| Punitiveness              | .242**    | .111       | .296**    | .273**    | .124*      | .247**     | .243**    | .286**    | .203**    | .193**    |
| Selfsacrifice             | .262**    | .163**     | .229**    | .200**    | .170**     | .146*      | .146*     | .171**    | .216**    | .193**    |
| SocialIsolation           | .271**    | .305**     | .338**    | .301**    | .244**     | .205**     | .352**    | .333**    | .309**    | .256**    |
| Subjugation               | .299**    | .208**     | .375**    | .383**    | .266**     | .218**     | .304**    | .305**    | .288**    | .245**    |
| Unrelenting Standards     | .299**    | .301**     | .258**    | .302**    | .209**     | .278**     | .249**    | .243**    | .222**    | .236**    |
| Vulnerability             | .312**    | .298**     | .408**    | .289**    | .227**     | .230**     | .377**    | .328**    | .277**    | .271**    |

\*\* . Correlation is significant at the 0.01 level (2-tailed).

\* . Correlation is significant at the 0.05 level (2-tailed).

OC = Over-Control; EID = Emotional Inhibition and Deprivation; UI = Undependability and Irresponsibility; OO = Overprotection and Overindulgence; NIG – Neglect and Insufficient Guidance; CSS = Competitiveness and Status Seeking; IE = Intrusiveness and Exploitation; DR = Degradation and Rejection; SE = Social Exclusion; PA = Punitiveness and Abuse
